# Supplementary material for: Optimising the reach of mobile health messaging programmes: an analysis of system generated data for the Kilkari programme across 13 states in India
Source: PubMed Central journal article supplement (PMC9366343; doi:10.1136/bmjgh-2022-009395), 2022-08-08

**Supplementary Figure 1. Reasons for rejection of records from ingestion into Kilkari program engine for 2018**

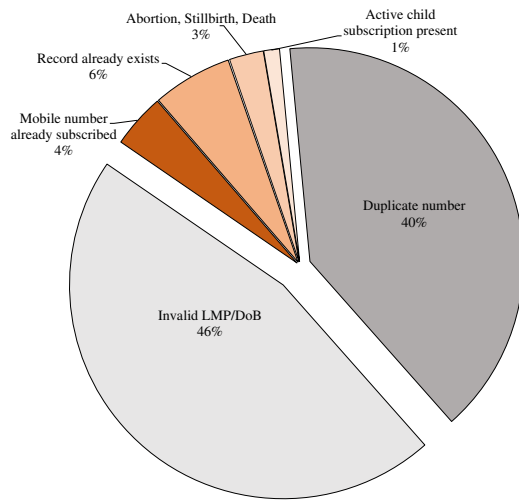

**Supplementary Figure 2. Monthly subscriptions across different states created by pregnant women in the Kilkari program for 2018**

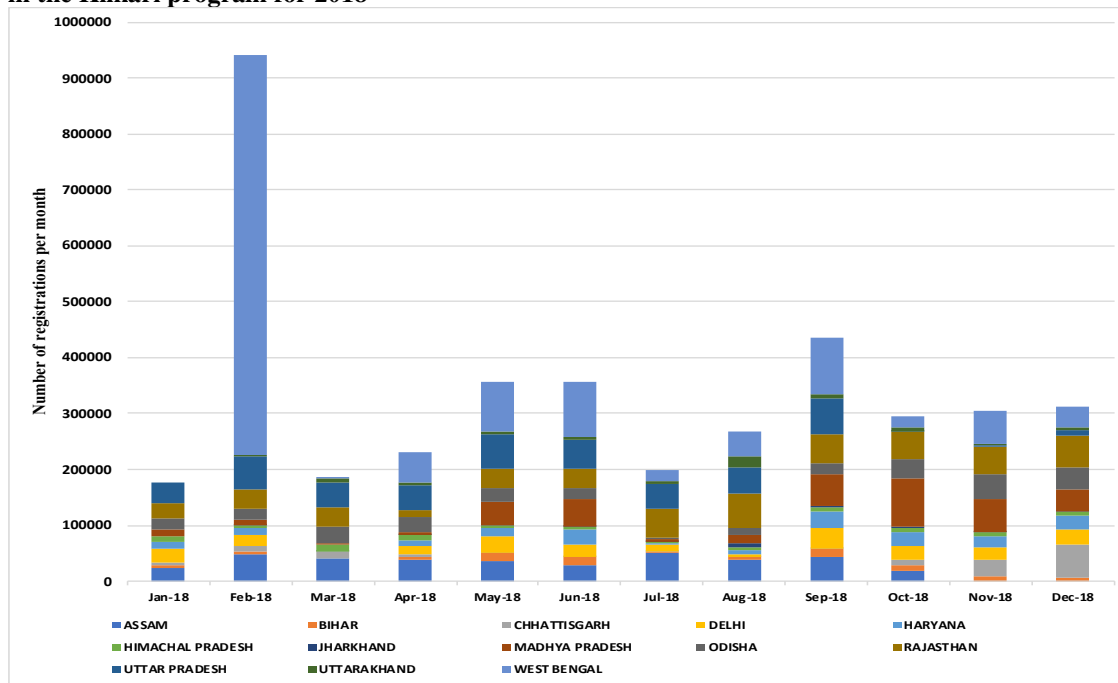

**Supplementary Figure 3 - Percentage of subscribers enrolled during pregnancy in 2018 with an updated child's date of birth**

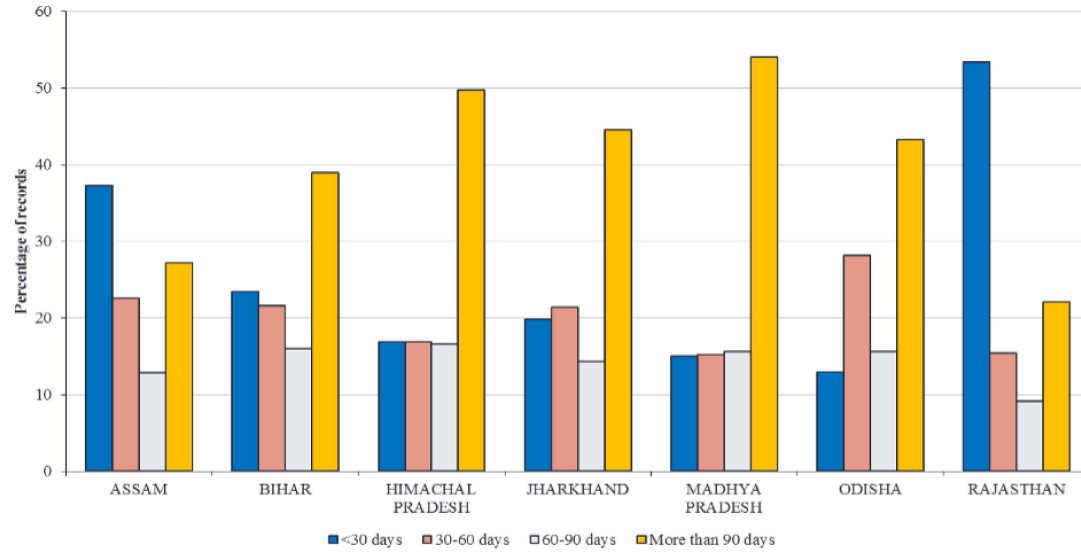

Supplement: bmjgh-2022-009395supp001.pdf [file bmjgh-2022-009395supp001.pdf]
